# Supplementary material for: Ethanol production potential from AFEX™ and steam-exploded sugarcane residues for sugarcane biorefineries
Source: Biotechnol Biofuels. 2018 May 4;11:127. doi: 10.1186/s13068-018-1130-z (PMC5934847; doi:10.1186/s13068-018-1130-z)
Supplement: Supplementary file 3 — Additional file 3: Fig. S1. Design of experiments results for evaluating the effect of AFEX™ pretreatment conditions on the monomeric combined sugar yield from sugarcane bagasse and CLM. [file 13068_2018_1130_MOESM3_ESM.docx]

**Additional File 3**

Fig. S1-A: Contour plots illustrating the effect of temperature, ammonia loading and water loading on the combined monomeric sugar (glucose and xylose) yield for sugarcane bagasse and cane leaf matter.

**b. AFEXTM-Bagasse: Regression coefficients and *p*-values**

**a. AFEXTM-Bagasse: Residual plots for combined sugar yield**

**d. AFEXTM-CLM: Regression coefficients and *p*-values**

**c. AFEXTM-CLM: Residual plots for combined sugar yield**

Fig. S1-B: The statistical residual plots and regression coefficients used to validate ANOVA assumptions in evaluating the effect of AFEXTM pretreatment conditions on the monomeric combined sugar yield from sugarcane bagasse and CLM. Abbreviations: S - Standard Error of the Regression, PRESS - Prediction Sum of Squares.
